# Supplementary material for: Quality Indicators for Safe Medication Preparation and Administration: A Systematic Review
Source: PubMed Central journal article supplement (PMC4401721; doi:10.1371/journal.pone.0122695), 2015-04-17
Supplement: pone.0122695.s003.pdf [file pone.0122695.s003.pdf]

**Supporting information S3: Data extraction form**

| Reference<br>(author,<br>year of<br>publication) | Objective | Study<br>design | Participants | Type of<br>indicator(s)<br>(structure,<br>process,<br>outcome) | Description<br>of<br>Indicator(s) | Main findings |
|--------------------------------------------------|-----------|-----------------|--------------|----------------------------------------------------------------|-----------------------------------|---------------|
|                                                  |           |                 |              |                                                                |                                   |               |
|                                                  |           |                 |              |                                                                |                                   |               |
|                                                  |           |                 |              |                                                                |                                   |               |
|                                                  |           |                 |              |                                                                |                                   |               |
